# Supplementary material for: Effects of caloric restriction on neuropathic pain, peripheral nerve degeneration and inflammation in normometabolic and autophagy defective prediabetic Ambra1 mice
Source: PLOS journal article supplement (doi:10.1371/journal.pone.0208596), 2018-12-10
Supplement: S12 (10.1371/journal.pone.0208596.s012) [file journal.pone.0208596.s012]

| a) Nerve Lysate WT naïve vs WT CCI D7 ST                             |                                                                                            |             |
|----------------------------------------------------------------------|--------------------------------------------------------------------------------------------|-------------|
| Mediator                                                             | Function                                                                                   | Fold change |
| Eotaxin-1 (CCL11)                                                    | chemotactic for eosinophils, basophils, implicated in allergic responses                   | 1,94        |
| Granulocyte colony-stimulating factor (GCSF)                         | stimulates growth of progenitors of mono, neutro, eosino and baso; activates macrophages   | 1,95        |
| IL1-beta                                                             | induces IL-1,6,8, TNF, GM-CSF by macrophages; proinflammatory                              | 1,90        |
| IL2                                                                  | promotes the differentiation of immature T cells into regulatory T cells; pro-inflammatory | 1,59        |
| IL6                                                                  | pro-inflammatory cytokine; anti-inflammatory myokine; secreted by T cells and macrophages  | 2,22        |
| metallopeptidase inhibitor 1 (TIMP-1)                                | tissue inhibitor of metalloproteinases                                                     | 4,71        |
| sTNF RI                                                              | endogenous inhibitors of TNF                                                               | 2,61        |
| Eotaxin-1 (CCL11)                                                    | chemotactic for eosinophils, basophils, implicated in allergic responses                   | 1,94        |
| b) Serum WT naïve vs WT CCI D7 ST                                    |                                                                                            |             |
| Mediator                                                             | Function                                                                                   | Fold change |
| CD30LG                                                               | cell membrane protein of the tumor necrosis factor receptor family                         | 1,80        |
| Eotaxin-1 (CCL11)                                                    | chemotactic for eosinophils, basophils, implicated in allergic responses                   | 2,65        |
| Eotaxin-2 (CCL24)                                                    | chemotactic for basophils, Th2 lymphocytes, and tryptase-chymase mast cells                | 3,46        |
| Granulocyte colony-stimulating factor (GCSF)                         | stimulates growth of neutro progenitors                                                    | 2,48        |
| IL-1 beta                                                            | induces IL-1,6,8,TNF, GM-CSF by macrophages; proinflammatory                               | -1,76       |
| IL-6                                                                 | pro-inflammatory cytokine; anti-inflammatory myokine; secreted by T cells and macrophages  | -2,10       |
| IL-12 p40/p70                                                        | inflammatory cytokine inducer                                                              | -1,86       |
| Keratinocyte-derived chemokine (KC)/chemokine (C-X-C motif) ligand 1 | recruits and activates leukocytes                                                          | -1,77       |
| TNF alpha                                                            | inflammation; induces cytokine secretion; activates macrophages                            | -1,56       |
| sTNF R I                                                             | endogenous inhibitors of TNF                                                               | -1,53       |
| sTNF R II                                                            | endogenous inhibitors of TNF                                                               | -1,86       |
| MIP-1 alpha (CCL3)                                                   | chemotactic for monocytes/macrophages, T lymphocytes, basophils and eosinophils            | -2,11       |
